# Supplementary material for: Temperature dependence of charge transport in molecular ensemble junctions
Source: Royal Society of Chemistry journal article supplement (doi:10.1039/d4tc01807a), 2024-01-01
Supplement: d4tc01807a1.pdf [file d4tc01807a1.pdf]

## Supplementary Information

### Temperature Dependence of Charge Transport in Molecular Ensemble Junctions

Ryan P. Sullivan,<sup>a</sup> John T. Morningstar,<sup>b</sup> Manikanta Makala,<sup>a</sup> Mark E. Welker,<sup>b</sup> and Oana D. Jurchescu <sup>\*a</sup>

<sup>1</sup>Department of Physics and Center for Functional Materials, Wake Forest University, Winston-Salem, NC 27109, USA.

<sup>2</sup>Department of Chemistry and Center for Functional Materials, Wake Forest University, Winston-Salem, NC 27109, USA

\*Corresponding author: [jurchescu@wfu.edu](mailto:jurchescu@wfu.edu) (O.D.J.)

#### The PDF file includes:

Figure: S1

a

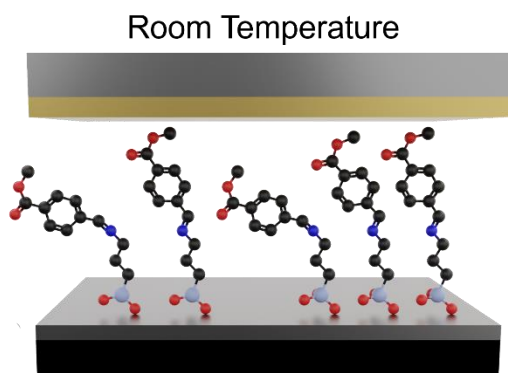

b

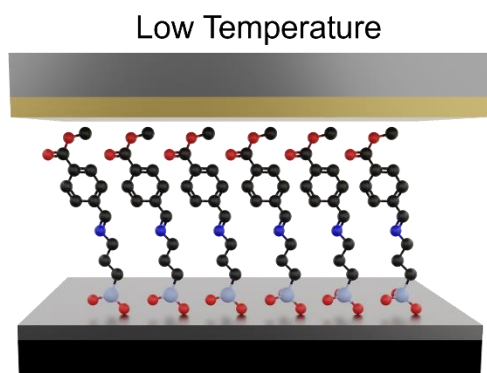

**Fig S1.** Illustrations of different molecular configurations of SAMs at room temperature (a) and at low temperature (b) due to entropic effects.
